# Supplementary material for: Hot electron transfer in Zn–Ag–In–Te nanocrystal–methyl viologen complexes enhanced with higher-energy photon excitation
Source: Royal Society of Chemistry journal article supplement (doi:10.1039/d0ra02842h), 2020-01-01
Supplement: d0ra02842h1.pdf [file d0ra02842h1.pdf]

## Supporting information

### Hot Electron Transfer in Zn-Ag-In-Te Nanocrystal-Methyl Viologen Complexes Enhanced with Higher-Energy Photon Excitation

Tatsuya Kameyama,<sup>ab</sup> Kouta Sugiura,<sup>a</sup> Susumu Kuwabata,<sup>c</sup> Tomoki Okuhata,<sup>d</sup> Naoto Tamai,<sup>d</sup> and Tsukasa Torimoto<sup>\*a</sup>

<sup>a</sup>Graduate School of Engineering, Nagoya University, Chikusa-ku, Nagoya 464-8603, Japan.

<sup>b</sup>JST, PRESTO, 4-2-8 Hon-cho, Kawaguchi, Saitama 332-0012, Japan.

<sup>c</sup>Graduate School of Engineering, Osaka University, Suita, Osaka 565-0871, Japan.

<sup>d</sup>School of Science and Technology, Kwansei Gakuin University, 2-1 Gakuen, Sanda, Hyogo 669-1337, Japan.

Correspondence to: [torimoto@chembio.nagoya-u.ac.jp](mailto:torimoto@chembio.nagoya-u.ac.jp)

## 1. Experimental

### Preparation of Zn-Ag-In-Te (ZAiTe) NC-MV<sup>2+</sup> complexes

ZAiTe NC-MV<sup>2+</sup> complexes were prepared according to a previous report on CdSe NC-MV<sup>2+</sup> complexes with slight modification.<sup>1,2</sup> ZAiTe NCs ((AgIn)<sub>x</sub>Zn<sub>2(1-x)</sub>Te<sub>2</sub>) in octane solution were synthesized with an  $x$  value of 0.75 by the reported method.<sup>3</sup> The original solution of ZAiTe NCs (0.20 cm<sup>3</sup>) was diluted ten times with octane, and then 10 mm<sup>3</sup> MV<sup>2+</sup> (1.0 mmol dm<sup>-3</sup>) of ethanol solution was added to the solution with vigorous stirring. After ethanol had been removed by evaporation, the solution was diluted to 5.0 cm<sup>3</sup> with octane. The sample of thus-prepared ZAiTe NC-MV<sup>2+</sup> complexes was used for measurement.

## 2. Results

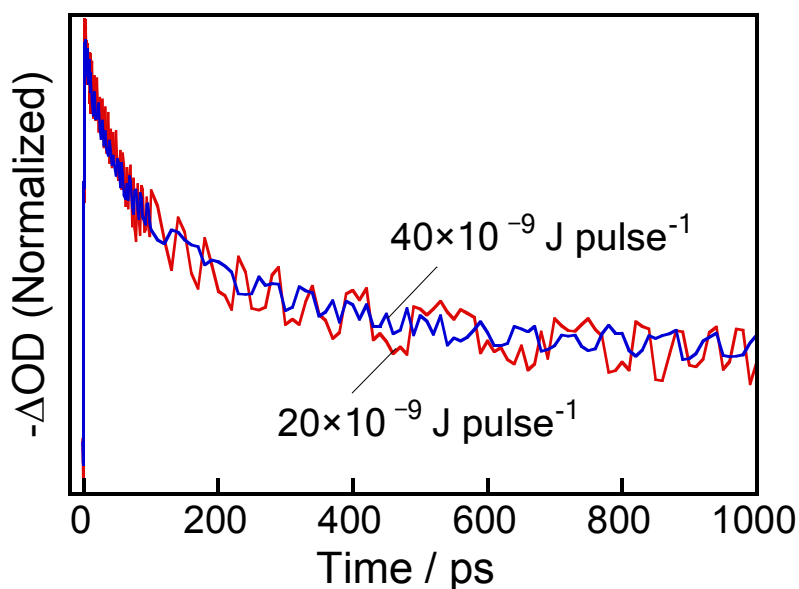

**Figure S1.** Comparison of TA dynamics of ZAiTe NCs at 1.29 eV photoexcited by 1.55-eV photons with different excitation intensities.

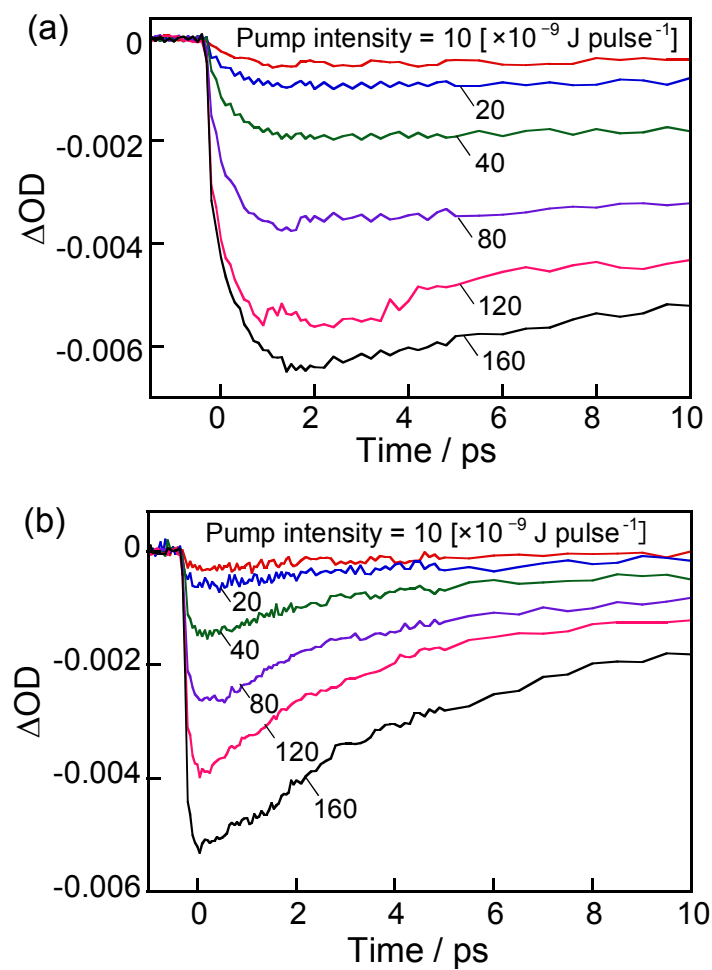

**Figure S2.** TA recovery dynamics of ZAlTe NCs at 1.29 eV excited by irradiation of 1.55-eV photons with different pump intensities. The samples were ZAlTe NCs (a) and ZAlTe NC-MV<sup>2+</sup> complexes (b). Profiles for the fast component time region of less than 10 ps are shown.

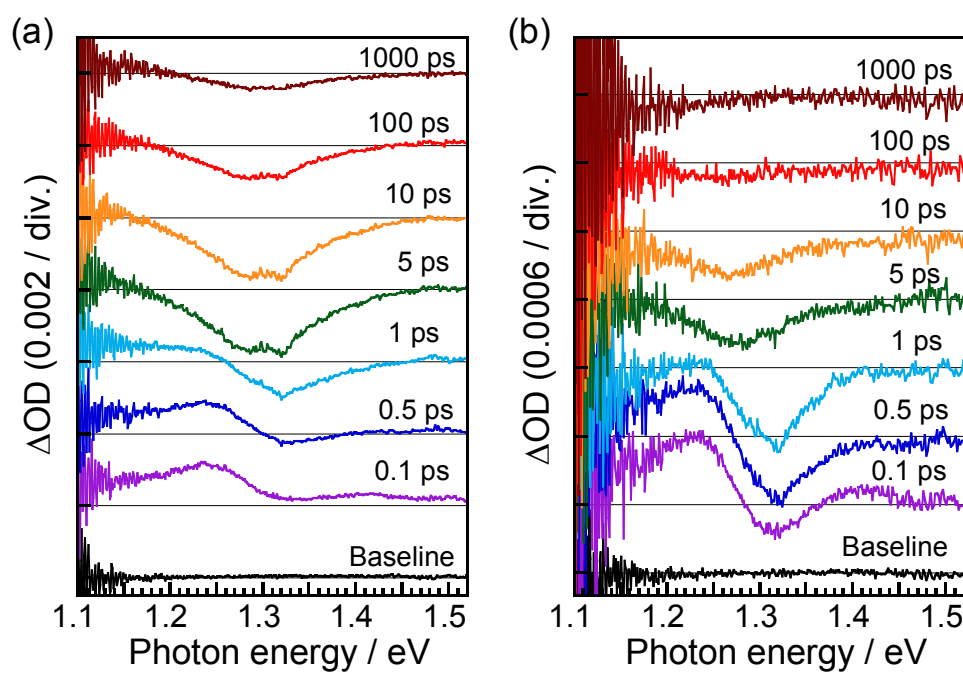

**Figure S3.** Transient absorption spectra of ZAlTe NCs (a) and ZAlTe NC-MV<sup>2+</sup> complexes (b) excited by irradiation of 3.1-eV photons with pump intensity of  $20 \times 10^{-9} \text{ J pulse}^{-1}$ .

**Table S1.** Multi-exponential fitting results for evolution and decay profiles of the bleaching signal at 1.29 eV in TA spectra (Fig. 2c and d).

| Excitation<br>energy / eV | Sample                                 | $h\nu/E_g$ | $\tau_{\text{rise}} / \text{ps}$ | $\tau_1 / \text{ps}$<br>( $A_1/\%$ ) | $\tau_2 / \text{ps}$<br>( $A_2/\%$ ) | $\tau_3 / \text{ns}$<br>( $A_3/\%$ ) |
|---------------------------|----------------------------------------|------------|----------------------------------|--------------------------------------|--------------------------------------|--------------------------------------|
| 1.55                      | ZAlTe NCs                              | 1.22       | 0.45                             | 36<br>(31%)                          | 210<br>(41%)                         | 6.1<br>(28%)                         |
|                           | ZAlTe NC-MV <sup>2+</sup><br>complexes |            | 0.22                             | 2.7<br>(67%)                         | 43<br>(33%)                          |                                      |

The TA decay profile can be fitted with the form,  $\Delta OD(t) \propto \sum_i A_i \exp\left(-\frac{t}{\tau_i}\right)$ , where  $\tau_i$  represent the lifetimes and  $A_i$  are the corresponding amplitudes.<sup>4</sup> The measured decay parameters along with the rise-time ( $\tau_{\text{rise}}$ ) are also presented. For obtaining the best-fit curve, tri- and bi-exponential functions were applied for ZAlTe NCs and ZAlTe NC-MV<sup>2+</sup> complexes, respectively.

### 3. References

- [1] Zhu, H.; Lian, T.; *J. Am. Chem. Soc.* **2012**, *134*, 11289–11297
- [2] Okuhata, T.; Tamai, N.; *J. Phys. Chem C*, **2016**, *120*, 17052–17059
- [3] Kameyama, T.; Sugiura, K.; Ishigami, Y.; Yamamoto, Y.; Kuwabata, S.; Okuhata, T.; Tamai, N.; Torimoto, T.; *J. Mater. Chem. C*, **2018**, *6*, 2034–2042
- [4] Wang, Y. F.; Wang, H. Y.; Li, Z. S.; Zhao, J.; Wang, L.; Chen, Q. D.; Wang, W. Q.; Sun, H. B.; *J. Phys. Chem. C*, **2014**, *118*, 17240–17246
